# Supplementary material for: Dyslipidaemia in HIV-1-infected patients receiving protease inhibitors after initial treatment with first-line-based non-nucleoside reverse transcriptase inhibitors: a cross-sectional study
Source: PubMed Central journal article supplement — BMJ Open. 2012 Aug 8;2(4):e001317. doi: 10.1136/bmjopen-2012-001317 (PMC3425906; doi:10.1136/bmjopen-2012-001317), 2012-08-08
Supplement: bmjopen-2012-001317.draft_revisions.pdf [file bmjopen-2012-001317.draft_revisions.pdf]

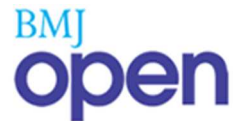

**Protease inhibitors are not associated with increased risk of dyslipidemia in HIV-1 infected patients initially treated with non-nucleoside reverse transcriptase inhibitors: a cross-sectional study**

|                                 |                                                                                                                                                                                                                                                                                                                                                                                                                                                                                                                                                                                                                                                                                                    |
|---------------------------------|----------------------------------------------------------------------------------------------------------------------------------------------------------------------------------------------------------------------------------------------------------------------------------------------------------------------------------------------------------------------------------------------------------------------------------------------------------------------------------------------------------------------------------------------------------------------------------------------------------------------------------------------------------------------------------------------------|
| Journal:                        | <i>BMJ Open</i>                                                                                                                                                                                                                                                                                                                                                                                                                                                                                                                                                                                                                                                                                    |
| Manuscript ID:                  | bmjopen-2012-001317                                                                                                                                                                                                                                                                                                                                                                                                                                                                                                                                                                                                                                                                                |
| Article Type:                   | Research                                                                                                                                                                                                                                                                                                                                                                                                                                                                                                                                                                                                                                                                                           |
| Date Submitted by the Author:   | 14-Apr-2012                                                                                                                                                                                                                                                                                                                                                                                                                                                                                                                                                                                                                                                                                        |
| Complete List of Authors:       | Pefura Yone, Eric Walter; Faculty of Medicine and Biomedical Sciences, University of Yaounde 1, Department of Internal Medicine and Subspecialties; Yaounde Jamot Hospital, Service of Pneumology Kengne, Andre; South African Medical Research Council, Ashuntantang, Gloria; Faculty of Medicine and Biomedical Sciences, University of Yaounde 1, Department of Internal Medicine and Subspecialties; Yaounde General Hospital, Medicine Service Betyoumin, Awa; Yaounde University centre, Department of Biochemistry Ngogang, Jeanne; Faculty of Medicine and Biomedical Sciences, University of Yaounde 1, Department of Biochemistry; Yaounde University centre, Department of Biochemistry |
| <b>Primary Subject Heading</b>: | Infectious diseases                                                                                                                                                                                                                                                                                                                                                                                                                                                                                                                                                                                                                                                                                |
| Secondary Subject Heading:      | Pharmacology and therapeutics, Nutrition and metabolism                                                                                                                                                                                                                                                                                                                                                                                                                                                                                                                                                                                                                                            |
| Keywords:                       | HIV & AIDS < INFECTIOUS DISEASES, Adverse events < THERAPEUTICS, Lipid disorders < DIABETES & ENDOCRINOLOGY                                                                                                                                                                                                                                                                                                                                                                                                                                                                                                                                                                                        |
|                                 |                                                                                                                                                                                                                                                                                                                                                                                                                                                                                                                                                                                                                                                                                                    |

SCHOLARONE™  
Manuscripts

1  
2  
3 **Protease inhibitors are not associated with increased risk of dyslipidemia in HIV-1**  
4 **infected patients initially treated with non-nucleoside reverse transcriptase inhibitors: a**  
5 **cross-sectional study**  
6  
7  
8  
9

10 Short title: **Protease inhibitors and dyslipidaemia**

11  
12 Eric Walter PEFURA YONE (1, 2), André Pascal KENGNE (3), Gloria ASHUNTANTANG  
13 (1,4), Awa FOUEUDJEU BETYOUUMIN (5), Jeanne NGOGANG (5,6)  
14  
15  
16  
17

18 1) Department of Internal Medicine and Subspecialties, Faculty of Medicine and Biomedical  
19 Sciences, University of Yaounde 1, Cameroon

20 2) Service of Pneumology, Yaounde Jamot Hospital

21 3) South African Medical Research Council & University of Cape Town, South Africa

22 4) Service of Internal Medicine, Yaounde General Hospital

23 5) Department of Biochemistry, Yaounde University centre

24 6) Department of Biochemistry, Faculty of Medicine and Biomedical Sciences, University of  
25 Yaounde 1, Cameroon  
26  
27  
28  
29  
30  
31  
32

33 **Correspondence to:**

34  
35 Dr Eric Walter Pefura Yone,

36  
37 Yaounde Jamot Hospital,

38  
39 PO Box 4021-Yaounde, Cameroon

40  
41 Tel: (237)96539726, Fax: (237)22203165,

42  
43 Email: pefura2002@yahoo.fr  
44  
45  
46  
47

48 **Tables: 2**

49 **Figures: 0**

50 **Online only material: 0**

51  
52 **Word count:** abstract-287; Main text (excluding tables, figures, abstract & references)-1,774  
53  
54  
55

56 **References: 24**  
57  
58  
59  
60

## Abstract

**Objectives:** Lipid abnormalities associated with antiretroviral therapy in people with HIV infection are more frequent with protease inhibitors (PI) based regimens. Whether effects extend to patients receiving a PI subsequent to failure on non-nucleoside reverse-transcriptase inhibitors (NNRTI) based regimen, is still unknown. We investigated the effects of secondary treatment with a PI on the lipid profile in a group of patients with HIV infection in Cameroon.

**Design:** This was a cross-sectional study.

**Setting:** This study was carried out at the registered centre for HIV treatment of the Yaounde Jamot hospital in Cameroon.

**Participants:** Participants were consecutively recruited between November 2009 and January 2010. There were 138 HIV-1 patients on initial treatment with a NNRTI regimen and 66 HIV-1 patients on secondary treatment with a PI for at least 12 months. Lipid abnormalities were based on the National Cholesterol Education Program, Adult Treatment Panel III criteria.

**Outcome measures:** Levels of lipid parameters among patients on PI and NNRTI.

**Results:** Median (interquartile range) levels (mg/dl), NNRTI-treated vs. PI-treated patients were 185 (149-225) and 189 (147-244) for total cholesterol, 46 (27-66) and 42 (28-82) for HDL-cholesterol, 121 (90-169) and 126.9 (71-176) for LDL-cholesterol, 134 (98-174) and 138 (111-167) for triglycerides, and 4.3 (2.9-6.2) and 5.1 (2.6-7.9) for total/HDL-cholesterol ratio (all  $p>0.32$ ). The most frequent lipid abnormality in the two groups was high LDL-cholesterol [46.4% (NNRTI) vs. 54.5% (PI)]. Occurrence of lipid abnormalities was similar in the two groups (all  $p>0.29$ ).

**Conclusions:** The use of PI does not appear to deteriorate the lipid profile of HIV patients above and beyond abnormalities induced by an unsuccessful initial treatment with NNRTI. Monitoring of lipid profile during HIV treatment regardless of the regimens would improve timely detection and management of abnormalities, to mitigate related risks.

1  
2  
3 *Word count* – 287

4  
5 *Key words* – HIV infection, antiretroviral therapy, protease inhibitors, non-nucleoside reverse-  
6  
7 transcriptase inhibitors, lipid profile  
8  
9

10 **Article summary**

11  
12 **Article focus:**

- 13  
14  
15 - To investigate the effects of secondary treatment with a protease inhibitors on the lipid  
16  
17 profile in a group of patients with HIV infection in Cameroon.  
18

19 **Key messages:**

- 20  
21 - The differential contribution of antiretroviral agents to lipid abnormalities suggests that  
22  
23 hypothetically, switching patients from first-line to second-line treatment may have  
24  
25 deleterious effects on their lipid profile.  
26  
27  
28 - Effects of protease inhibitors on lipid profile among patients receiving the protease  
29  
30 inhibitors subsequent to failure on non-nucleoside reverse-transcriptase inhibitors based  
31  
32 regimen are still unknown.  
33  
34  
35 - In this study, the use of protease inhibitors does not appear to deteriorate the lipid profile of  
36  
37 HIV patients above and beyond abnormalities induced by an unsuccessful initial treatment  
38  
39 with non-nucleoside reverse-transcriptase inhibitors.  
40

41 **Strengths and limitations:**

- 42  
43 - To our knowledge, such hypothesis has not yet been tested.  
44  
45  
46 - This is a cross-sectional study which lacked of previous level of lipid parameters of  
47  
48 participants.  
49  
50  
51  
52  
53  
54  
55  
56  
57  
58  
59  
60

## INTRODUCTION

Antiretroviral treatments are associated with widely described abnormal changes in the lipid profile in people with HIV infection.[1,2] Although more frequent during treatment with protease inhibitors (PI),[1,3,4] these changes are also observed during treatment with stavudine and to a lesser extent with non-nucleoside reverse-transcriptase inhibitors (NNRTI).[1,5] Such changes include raised total and LDL cholesterol, raised triglycerides and variable effects on HDL cholesterol levels.[1,4]

The increasing rollout of antiretroviral treatment over the last ten years has significantly improved survival among people living with HIV.[6] This however has been achieved at the cost of increasing resistance to first-line antiretroviral therapies.[7,8] In sub-Saharan Africa (SSA), the epicentre of HIV pandemic, the widely used first-line antiretroviral regimen, inspired by the World Health Organisation (WHO), combines two nucleoside reverse-transcriptase inhibitors (NRTI) with a non-nucleoside reverse-transcriptase inhibitor (NNRTI).[9] Protease inhibitors (PI) are the compulsory component of the second line treatment subsequent to the failure of the first-line one in this setting.[9,10] The differential contribution of antiretroviral agents to lipid abnormalities suggests that hypothetically, switching patients from first-line to second-line treatment in SSA may have deleterious effects on their lipid profile. However, such hypothesis has not yet been tested.

We compared the lipid profile of HIV-1 patients receiving the WHO recommended 1<sup>st</sup>-line therapy with that of patients on 2<sup>nd</sup>-line therapy subsequent to first-line treatment failure.

## PARTICIPANTS AND METHODS

### Study setting and Participants

This cross-sectional study was conducted at the registered centre for HIV treatment of the Yaounde Jamot hospital in Cameroon. The study setting has been described in details elsewhere.[11] Participants were consecutively recruited between November 2009 and

1  
2  
3 January 2010. Two groups of HIV-1 positive participants were selected. The first group  
4  
5 included individuals who had received antiretroviral treatment for the 12 preceding months or  
6  
7 more, based on the WHO first-line regimens or NNRTI-based regimen (NNRTI-based group).  
8  
9 The second group included individuals who were receiving second-line antiretroviral  
10  
11 treatment or PI based regimen for at least 12 months after failure of the first-line regimen (PI-  
12  
13 based group). First-line ART regimens applied to these participants combined lamivudine  
14  
15 (3TC) and stavudine (d4T) or zidovudine (AZT) with nevirapine (NVP) or efavirenz (EFV).  
16  
17 The PI-based regimens included abacavir (ABC), didanosine (DDI) and lopinavir/ritonavir  
18  
19 (LPV-r) or indinavir (IDV). The choice of regimens is unrelated to potential factors that could  
20  
21 induce a dyslipidemia, since lipid profile assessment is a requirement in routine pre-ART  
22  
23 treatment evaluation in this setting.[12] Failure on 1<sup>st</sup> line antiretroviral therapy in the study  
24  
25 setting is based on persisting plasmatic HIV-1 viral load of 5000 copies/ml or greater, after a  
26  
27 year on antiretroviral treatment. Diagnosis of therapeutic failure to the first-line ART is  
28  
29 always confirmed after a reinforcement of the adherence for a period of 3 months.[9] Patients  
30  
31 who had had their treatment regimens changed during follow-up were excluded. Participants  
32  
33 had to be at least 18 years of age and to have a treatment adherence rate  $\geq 95\%$ . Level of  
34  
35 adherence was assessed by verbal administration of a standard series of questions adapted  
36  
37 from Adult AIDS clinical trials group (AACTG) adherence instruments. The 95% rate of  
38  
39 adherence is preferable to 4-day recall data.[13] Participants were also required not to be on  
40  
41 lipid modifying therapies at their enrolment. All participants gave their inform consent and  
42  
43 the study was approved by the Cameroon National Ethic Committee (ref N°150/CNE/SE/09).  
44  
45  
46  
47  
48

### 49 **Procedures**

50  
51 For each participant, data were collected on the sociodemographic background, past medical  
52  
53 history including the use of medications that could modify the lipid profile and active or  
54  
55 history of tuberculosis. Lymphocytes count for all participants used flux cytometry methods  
56  
57  
58  
59  
60

1  
2  
3 implemented with BD FASCOUNT automate (BD Biosciences, Le pont de Claix, France).  
4  
5 Lipid profile was assessed through enzymatic methods (Linear chemicals, Montgat, Spain)  
6  
7 and included total cholesterol (TC), HDL-cholesterol (HDL-c), LDL-cholesterol (LDL-c) and  
8  
9 triglycerides (TG). To this end, blood sample was collected after an overnight fast (12 hours)  
10  
11 and centrifuged at 3000 cycles/minute, and the serum obtained was then used for lipids  
12  
13 determination. The TC/HDL-c ratio was also calculated. Abnormal lipid profile was defined  
14  
15 in accordance with the US National Cholesterol Education Program, Adult Treatment Panel  
16  
17 III (NCEP-ATP III) guidelines, as TC  $\geq$  200mg/dl, HDL-c  $<$  40mg/dl, LDL-c  $\geq$  130mg/dl, TG  
18  
19  $\geq$  150mg/dl and TC/HDL-c ratio  $\geq$  5.[14]  
20  
21

### 22 **Statistical analysis**

23  
24 Sample size was determined assuming a 35% prevalence of total cholesterol  $\geq$  200 mg/dl in  
25  
26 the NNTI based group, a minimum detectable unadjusted odds ratio (OR) of 2, a Type I error  
27  
28 of 5% and a power of 80%.[15] Based on the above, the required sample size was 84  
29  
30 participants (42 NNTI treated patients and 42 IP treated patients). Data analysis used the  
31  
32 Statistical package for social sciences (SPSS) version 17 for Windows (SPSS, Chicago, IL).  
33  
34 Differences in means and proportions for participants' characteristics were assessed using  
35  
36 Student t-test, Mann –Whitney U test and  $\chi^2$  tests. A probability threshold of  $p < 0.05$  was  
37  
38 used to characterise statistical significant results.  
39  
40  
41  
42

## 43 **RESULTS**

### 44 **Study population**

45  
46 The total number of participants included in each study group was 138 (NNRTI-based  
47  
48 regimen) and 66 (PI-based regimen). NNRTI-based regimens were d4T/3TC/NVP (61  
49  
50 patients), d4T/3TC/EFV (32 patients), AZT/3TC/NVP (31 patients) and AZT/3TC/EFV (14  
51  
52 patients); while PI-based regimens were DDI/ABC/INV (35 patients) and DDI/ABC/LPV-r  
53  
54 (31 patients). The characteristic of participants are summarised in Table 1. The median  
55  
56  
57  
58  
59  
60

duration on ART was higher among participants in the PI-regimen group than among those on NNRTI-regimens (36 vs. 28 months,  $p=0.001$ ). This included a 22-month period on NNRTI-regimens and 14-month duration on PI-based regimens. Sex distribution, mean age, body mass index and median CD4 count were similar between the two study groups (Table 1).

Table 1: Profile of 138 patients on NNRTI-based regimens and 66 patients on protease inhibitors based regimens

| Characteristics                                  | NNRTI-based regimen<br>(n=138) | PI-based regimen<br>(n=66) | p     |
|--------------------------------------------------|--------------------------------|----------------------------|-------|
| Women, n (%)                                     | 90 (65.2)                      | 39 (59.1)                  | 0.396 |
| Mean age, years (SD)                             | 40.6 (8.7)                     | 42.5 (8.7)                 | 0.154 |
| Mean body mass index, kg/m <sup>2</sup> (SD)     | 24.6 (4.7)                     | 23.8 (3.9)                 | 0.208 |
| Median CD4 count, per mm <sup>3</sup> (IQR)      | 333(206-459)                   | 330 (172-451)              | 0.747 |
| Median duration on ART, months (IQR)             | 28 (13-40)                     | 36 (24-50)                 | 0.001 |
| Median duration on NNRTI-based ART, months (IQR) | 28 (13-40)                     | 22 (10-36)                 | 0.001 |
| Median duration on PI-based ART, months (IQR)    | NA                             | 14 (12-20)                 | NA    |

NNRTI, non-nucleoside reverse transcriptase inhibitors; PI, protease inhibitor; ART, antiretroviral therapy; SD, standard deviation; IQR, interquartile range; NA, not applicable

### Lipid profile

Median levels of TC, HDL-c, LDL-c, triglycerides and lipid ratio were similar between participants on PI-based regimens and those on NNRTI-based regimens (Table 2). The prevalence of lipid abnormalities (NNRTI-based vs. PI-based regimens) was 38% vs. 44% for  $TC \geq 200$  mg/dl ( $p=0.39$ ), 46% vs. 56% for  $LDL-c \geq 130$  mg/dl ( $p=0.30$ ), 40% vs. 46% for  $HDL-c < 40$  mg/dl ( $p=0.54$ ), 44 vs. 36% for  $triglycerides \geq 150$  mg/dl ( $p=0.33$ ) and 36% vs. 29% for  $TC/HDL-c \geq 5$  ( $p=0.34$ ). The pattern was similar in men and women, participants above and below median age, and after adjustment for age, sex, and total duration on ART in linear and logistic regression analyses.



Table 2: Median levels of different lipid parameters in patients on NNRTI-based and PI-based regimens in Yaounde, Cameroon

| Lipid variable              | NNRTI-based regimen<br>(n=138) | PI-based regimen<br>(n=66) | p     |
|-----------------------------|--------------------------------|----------------------------|-------|
| Total cholesterol, mg/dl    | 184.7 (149.3-225.0)            | 189.5 (146.7-243.8)        | 0.688 |
| HDL cholesterol, mg/dl      | 45.84(27.0-66.0)               | 42.16(27.6-82.3)           | 0.568 |
| LDL cholesterol, mg/dl      | 121.4(89.7-168.7)              | 126.9(70.8-176.5)          | 0.767 |
| Triglycerides, mg/dl        | 134.5 (98.3-174.0)             | 138.0 (111.1-166.6)        | 0.468 |
| Total/HDL-cholesterol ratio | 4.3 (2.9-6.2)                  | 5.1 (2.6-7.9)              | 0.329 |

Data are median (interquartile range); NNRTI, non-nucleoside reverse transcriptase inhibitors; PI, protease inhibitor

## DISCUSSION

There is an abundant literature on the improvement of lipid profile of people with HIV subsequent substitution of NNRTI or NRTI for PI in the treatment regimens.[16] We are not aware of a study that has examined the effects of PI on lipid profile of patients initially treated with NNRTI. The current study was conducted in a setting where virtually all treated HIV-1 patients are almost always started on a NNRTI-based regimen as first-line therapy, and shifted to PI-based regimens only after failure of the first-line therapy. Our findings suggest that this transition to PI-based regimens may not be associated with significant deterioration of the lipid profile.[1,5] Indeed, median serum lipid levels and prevalence of lipid abnormalities were similar in patients on initial treatment with a NNRTI-regimen and those on secondary treatment with a PI-regimen. These findings were consistent by gender, age and CD4 count, and robust to adjustment for several covariates.

In sub-Saharan and other developing countries, NNRTI-based regimens not containing a PI are associated with pro-atherogenic adverse lipid changes.[15,17-19] However, the World

1  
2  
3 Health Organisation's recommendations,[9,10] enforced at the country level in Cameroon[12]  
4  
5 and elsewhere, suggest that only those HIV patients on a PI should be screened for  
6  
7 dyslipidemia. These recommendations are applied against a background of scarcity of  
8  
9 comparative studies on lipid profile of patients and NNRTI with that of those on a PI. By  
10  
11 demonstrating findings suggesting that continuation treatment with a PI may not necessarily  
12  
13 induce lipid derangements above and beyond those induced by prior NNRTI, our study  
14  
15 emphasizes the need to extend screening for dyslipidemia in this setting to any patient on  
16  
17 antiretroviral therapy regardless of the regimens. Such an approach may help early detection  
18  
19 of lipid abnormalities and mitigation of related risks.  
20  
21

22  
23 High LDL-cholesterol was the most common lipid abnormality found in our study. High  
24  
25 LDL-cholesterol is a major lipid abnormality, and a treatment target for cardiovascular  
26  
27 prevention.[20] That lipid abnormalities in the general population in Cameroon and other  
28  
29 countries in the region are generally rare, suggests that lipid abnormalities in our patients were  
30  
31 induced by antiretroviral therapy. It is also possible that high LDL-cholesterol was at least in  
32  
33 part the result of the 'catch-up phenomenon'. Indeed, untreated HIV infection is associated  
34  
35 with low LDL-c,[21-23] and levels generally increase subsequent to starting antiretroviral  
36  
37 therapy<sup>17</sup>. Total cholesterol/HDL cholesterol ratio, a commonly used indicator of the  
38  
39 atherogenic potential of the lipid profile [24] was similar between patient on a PI and those on  
40  
41 NNRTI-regimens. This suggests that, at least in medium term, treatment with a PI does not  
42  
43 deteriorate the atherogenic potential of the lipid profile of patients previously on NNRTI-  
44  
45 based regimens.  
46  
47

48  
49 Our study has some limitations. The cross-sectional design precludes any inference about  
50  
51 causality. It is unlikely that patients who failed on first-line antiretroviral therapy in this  
52  
53 setting are those with favourable lipid profile, and that our findings may actually reflect  
54  
55 subsequent deterioration, causing their profile to be similar to that of a broader population on  
56  
57

1  
2  
3 NNRTI. Indeed, our previous investigations in this setting suggest that markers of disease  
4 severity such as CD4 counts are not associated with lipid abnormalities.[17] It is also possible  
5 that with a much large sample, some of the small differences could become significant. This  
6 however, would not invalidate the conclusions from the study. Previous studies have  
7 demonstrated lipid abnormalities to be more frequent in NNRTI than in ART-naïve patients in  
8 this setting,[17] precluding the need for an ART-naïve control group in the present study. Our  
9 study also has major advantages, for instance, by demonstrating perhaps for the first time that  
10 transition from a NNRTI-based regimen to a PI-based regimen should not necessarily invite  
11 changes in the monitoring protocol for lipid abnormalities.  
12  
13  
14  
15  
16  
17  
18  
19  
20  
21

22 In conclusion, treatment of HIV-1 patients with protease-inhibitors based regimens  
23 subsequent to failure on NNRTI-based regimens may not deteriorate the lipid profile above  
24 and beyond derangements cause by prior NNRTI in our setting. Recommendations for lipid  
25 abnormalities in HIV patients on treatment should apply to everyone on antiretroviral  
26 treatment in this setting. Cohort data are needed to refine the findings from this study and  
27 monitor the adverse consequence of lipid derangements.  
28  
29  
30  
31  
32  
33  
34  
35

36 **Competing interests** – None for all authors

37 **Source of funding** – None

38 **Authors' contribution** – EWPY conceived the study, supervised data collection, co-analysed  
39 the data and drafted of the manuscript; APK contributed to study designed, data analysis,  
40 drafting and critical revision of the manuscript; GA critically revised the manuscript; AFB  
41 contributed to data collection and co-analysed the data; JN supervised data collection and  
42 critically revised the manuscript. All authors approved the final version of the manuscript.  
43  
44  
45  
46  
47  
48

## 49 REFERENCES

- 50  
51 1. Grunfeld C. Dyslipidemia and its treatment in HIV infection. *Top HIV Med*  
52 2010;**18**:112-8.  
53  
54  
55  
56  
57  
58  
59  
60

- 1  
2  
3 2. Troll JG. Approach to dyslipidemia, lipodystrophy, and cardiovascular risk in patients  
4 with HIV infection. *Curr Atheroscler Rep* 2011;**13**:51-56.
- 5  
6  
7 3. Heath KV, Chan KJ, Singer J, et al. Incidence of morphological and lipid  
8 abnormalities: Gender and treatment differentials after initiation of first antiretroviral  
9 therapy. *Int J Epidemiol* 2002;**31**:1016-1020.
- 10  
11  
12 4. Feeney ER, Mallon PW. HIV and HAART-associated dyslipidemia. *Open Cardiovasc*  
13 *Med J* 2011;**5**:49-63.
- 14  
15  
16 5. Domingos H, Cunha RV, Paniago AM, et al. Metabolic effects associated to the highly  
17 active antiretroviral therapy (HAART) in AIDS patients. *Braz J Infect Dis*  
18 2009;**13**:130-6.
- 19  
20  
21 6. Palella FJ, Jr., Delaney KM, Moorman AC, et al. Declining morbidity and mortality  
22 among patients with advanced human immunodeficiency virus infection. HIV  
23 outpatient study investigators. *N Engl J Med* 1998;**338**:853-60.
- 24  
25  
26 7. Gsponer T, Petersen M, Egger M, et al. The causal effect of switching to second-line  
27 ART in programmes without access to routine viral load monitoring. *AIDS*  
28 2012;**26**:57-65.
- 29  
30  
31 8. von Wyl V, Yerly S, Boni J, et al. Incidence of hiv-1 drug resistance among  
32 antiretroviral treatment-naive individuals starting modern therapy combinations. *Clin*  
33 *Infect Dis* 2012;**54**:131-140.
- 34  
35  
36 9. World Health Organisation. Recommandations rapides: Traitement antirétroviral de  
37 l'infection à VIH chez l'adulte et l'adolescent 2010.  
38 [http://www.who.int/hiv/pub/arv/rapid\\_advice\\_art\\_fr.pdf](http://www.who.int/hiv/pub/arv/rapid_advice_art_fr.pdf) (Accessed 12 December,  
39 2011).
- 40  
41  
42  
43  
44  
45  
46  
47  
48  
49  
50  
51  
52  
53  
54  
55  
56  
57  
58  
59  
60

- 1  
2  
3  
4  
5  
6  
7  
8  
9  
10  
11  
12  
13  
14  
15  
16  
17  
18  
19  
20  
21  
22  
23  
24  
25  
26  
27  
28  
29  
30  
31  
32  
33  
34  
35  
36  
37  
38  
39  
40  
41  
42  
43  
44  
45  
46  
47  
48  
49  
50  
51  
52  
53  
54  
55  
56  
57  
58  
59  
60
10. Ministère de la Santé Publique du Cameroun. Directives nationales de prise en charge par les antirétroviraux des personnes (adultes et adolescents) infectés par le VIH. Yaoundé 2010.
  11. Pefura Yone EW, Kengne AP, Kuaban C. Incidence, time and determinants of tuberculosis treatment default in yaounde, cameroon: A retrospective hospital register-based cohort study. *BMJ Open* 2011;**1**:e000289.
  12. World Health Organization. Antiretroviral therapy for HIV infection in adults and adolescents in resource-limited settings: Towards universal access. 2006 revision <http://www.who.int/hiv/pub/arv/adult/fr/index.html> (Accessed 10October 2010).
  13. Chesney MA, Ickovics JR, Chambers DB, et al. Self-reported adherence to antiretroviral medications among participants in HIV clinical trials: The AACTG adherence instruments. Patient care committee & adherence working group of the outcomes committee of the adult aids clinical trials group (aactg). *AIDS Care* 2000;**12**:255-66.
  14. Executive summary of the third report of the national cholesterol education program (NCEP) expert panel on detection, evaluation, and treatment of high blood cholesterol in adults (adult treatment panel 3). *JAMA* 2001;**285**:2486-97.
  15. Zannou DM, Denoëud L, Lacombe K, et al. Incidence of lipodystrophy and metabolic disorders in patients starting non-nucleoside reverse transcriptase inhibitors in benin. *Antivir Ther* 2009;**14**:371-80.
  16. Lake JE, Currier JS. Switching antiretroviral therapy to minimize metabolic complications. *HIV Ther* 2010;**4**:693-711.
  17. Pefura Yone EW, Betyoumin AF, Kengne AP, et al. First-line antiretroviral therapy and dyslipidemia in people living with hiv-1 in cameroon: A cross-sectional study. *AIDS Res Ther* 2011;**8**:33.

- 1  
2  
3 18. Buchacz K, Weidle PJ, Moore D, et al. Changes in lipid profile over 24 months among  
4 adults on first-line highly active antiretroviral therapy in the home-based aids care  
5 program in rural uganda. *J Acquir Immune Defic Syndr* 2008;**47**:304-11.  
6  
7  
8  
9  
10 19. Padmapriyadarsini C, Ramesh Kumar S, Terrin N, et al. Dyslipidemia among hiv-  
11 infected patients with tuberculosis taking once-daily nonnucleoside reverse-  
12 transcriptase inhibitor-based antiretroviral therapy in india. *Clin Infect Dis*  
13 2011;**52**:540-46.  
14  
15  
16  
17  
18 20. Grundy SM, Cleeman JI, Merz CN, et al. Implications of recent clinical trials for the  
19 national cholesterol education program adult treatment panel iii guidelines. *J Am Coll*  
20 *Cardiol* 2004;**44**:720-732.  
21  
22  
23  
24  
25 21. Oka F, Naito T, Oike M, et al. Correlation between HIV disease and lipid metabolism  
26 in antiretroviral-naive HIV-infected patients in japan. *J Infect Chemother* 2011; DOI  
27 10.1007/s10156-011-0275-5.  
28  
29  
30  
31  
32 22. Constans J, Pellegrin JL, Peuchant E, et al. Plasma lipids in HIV-infected patients: A  
33 prospective study in 95 patients. *Eur J Clin Invest* 1994;**24**:416-20.  
34  
35  
36  
37 23. Riddler SA, Smit E, Cole SR, et al. Impact of HIV infection and HAART on serum  
38 lipids in men. *JAMA* 2003;**289**:2978-82.  
39  
40  
41 24. Hsia SH, Pan D, Berookim P, et al. A population-based, cross-sectional comparison of  
42 lipid-related indexes for symptoms of atherosclerotic disease. *Am J Cardiol*  
43 2006;**98**:1047-1052.  
44  
45  
46  
47  
48  
49  
50  
51  
52  
53  
54  
55  
56  
57  
58  
59  
60

## STROBE Statement—checklist of items that should be included in reports of observational studies

|                           | Item No | Recommendation                                                                                                                                                                             | Pages |
|---------------------------|---------|--------------------------------------------------------------------------------------------------------------------------------------------------------------------------------------------|-------|
| <b>Title and abstract</b> | 1       | (a) Indicate the study's design with a commonly used term in the title or the abstract                                                                                                     | 1     |
|                           |         | (b) Provide in the abstract an informative and balanced summary of what was done and what was found                                                                                        | 2     |
| <b>Introduction</b>       |         |                                                                                                                                                                                            |       |
| Background/rationale      | 2       | Explain the scientific background and rationale for the investigation being reported                                                                                                       | 4     |
| Objectives                | 3       | State specific objectives, including any prespecified hypotheses                                                                                                                           | 4     |
| <b>Methods</b>            |         |                                                                                                                                                                                            |       |
| Study design              | 4       | Present key elements of study design early in the paper                                                                                                                                    | 4,5   |
| Setting                   | 5       | Describe the setting, locations, and relevant dates, including periods of recruitment, exposure, follow-up, and data collection                                                            | 4,5   |
| Participants              | 6       | (a) <i>Cohort study</i> —Give the eligibility criteria, and the sources and methods of selection of participants. Describe methods of follow-up                                            | /     |
|                           |         | <i>Case-control study</i> —Give the eligibility criteria, and the sources and methods of case ascertainment and control selection. Give the rationale for the choice of cases and controls | /     |
|                           |         | <i>Cross-sectional study</i> —Give the eligibility criteria, and the sources and methods of selection of participants                                                                      | 4,5   |
|                           |         | (b) <i>Cohort study</i> —For matched studies, give matching criteria and number of exposed and unexposed                                                                                   | /     |
| Variables                 | 7       | <i>Case-control study</i> —For matched studies, give matching criteria and the number of controls per case                                                                                 | /     |
|                           |         | Clearly define all outcomes, exposures, predictors, potential confounders, and effect modifiers. Give diagnostic criteria, if applicable                                                   | 5,6   |
| Data sources/measurement  | 8*      | For each variable of interest, give sources of data and details of methods of assessment (measurement). Describe comparability of assessment methods if there is more than one group       | 5,6   |
| Bias                      | 9       | Describe any efforts to address potential sources of bias                                                                                                                                  | 5     |
| Study size                | 10      | Explain how the study size was arrived at                                                                                                                                                  | 6     |
| Quantitative variables    | 11      | Explain how quantitative variables were handled in the analyses. If applicable, describe which groupings were chosen and why                                                               | 6     |
| Statistical methods       | 12      | (a) Describe all statistical methods, including those used to control for confounding                                                                                                      | 6     |
|                           |         | (b) Describe any methods used to examine subgroups and interactions                                                                                                                        | /     |
|                           |         | (c) Explain how missing data were addressed                                                                                                                                                | /     |
|                           |         | (d) <i>Cohort study</i> —If applicable, explain how loss to follow-up was addressed                                                                                                        |       |
|                           |         | <i>Case-control study</i> —If applicable, explain how matching of cases and controls was addressed                                                                                         |       |
|                           |         | <i>Cross-sectional study</i> —If applicable, describe analytical methods taking account of sampling strategy                                                                               | 6     |
|                           |         | (e) Describe any sensitivity analyses                                                                                                                                                      |       |

Continued on next page

**Results**

|                  |     |                                                                                                                                                                                                              |                |
|------------------|-----|--------------------------------------------------------------------------------------------------------------------------------------------------------------------------------------------------------------|----------------|
| Participants     | 13* | (a) Report numbers of individuals at each stage of study—eg numbers potentially eligible, examined for eligibility, confirmed eligible, included in the study, completing follow-up, and analysed            | 6              |
|                  |     | (b) Give reasons for non-participation at each stage                                                                                                                                                         | /              |
|                  |     | (c) Consider use of a flow diagram                                                                                                                                                                           | /              |
| Descriptive data | 14* | (a) Give characteristics of study participants (eg demographic, clinical, social) and information on exposures and potential confounders                                                                     | 6,7            |
|                  |     | (b) Indicate number of participants with missing data for each variable of interest                                                                                                                          | Not applicable |
|                  |     | (c) <i>Cohort study</i> —Summarise follow-up time (eg, average and total amount)                                                                                                                             |                |
| Outcome data     | 15* | <i>Cohort study</i> —Report numbers of outcome events or summary measures over time                                                                                                                          |                |
|                  |     | <i>Case-control study</i> —Report numbers in each exposure category, or summary measures of exposure                                                                                                         |                |
|                  |     | <i>Cross-sectional study</i> —Report numbers of outcome events or summary measures                                                                                                                           | 7              |
| Main results     | 16  | (a) Give unadjusted estimates and, if applicable, confounder-adjusted estimates and their precision (eg, 95% confidence interval). Make clear which confounders were adjusted for and why they were included | Not applicable |
|                  |     | (b) Report category boundaries when continuous variables were categorized                                                                                                                                    | /              |
|                  |     | (c) If relevant, consider translating estimates of relative risk into absolute risk for a meaningful time period                                                                                             | /              |
| Other analyses   | 17  | Report other analyses done—eg analyses of subgroups and interactions, and sensitivity analyses                                                                                                               | /              |

**Discussion**

|                  |    |                                                                                                                                                                            |        |
|------------------|----|----------------------------------------------------------------------------------------------------------------------------------------------------------------------------|--------|
| Key results      | 18 | Summarise key results with reference to study objectives                                                                                                                   | 8      |
| Limitations      | 19 | Discuss limitations of the study, taking into account sources of potential bias or imprecision. Discuss both direction and magnitude of any potential bias                 | 9,10   |
| Interpretation   | 20 | Give a cautious overall interpretation of results considering objectives, limitations, multiplicity of analyses, results from similar studies, and other relevant evidence | 8,9,10 |
| Generalisability | 21 | Discuss the generalisability (external validity) of the study results                                                                                                      | 10     |

**Other information**

|         |    |                                                                                                                                                               |    |
|---------|----|---------------------------------------------------------------------------------------------------------------------------------------------------------------|----|
| Funding | 22 | Give the source of funding and the role of the funders for the present study and, if applicable, for the original study on which the present article is based | 10 |
|---------|----|---------------------------------------------------------------------------------------------------------------------------------------------------------------|----|

\*Give information separately for cases and controls in case-control studies and, if applicable, for exposed and unexposed groups in cohort and cross-sectional studies.

**Note:** An Explanation and Elaboration article discusses each checklist item and gives methodological background and published examples of transparent reporting. The STROBE checklist is best used in conjunction with this article (freely available on the Web sites of PLoS Medicine at <http://www.plosmedicine.org/>, Annals of Internal Medicine at <http://www.annals.org/>, and Epidemiology at <http://www.epidem.com/>). Information on the STROBE Initiative is available at [www.strobe-statement.org](http://www.strobe-statement.org).





**Dyslipidemia in HIV-1 infected patients receiving protease inhibitors after initial treatment with first-line based non-nucleoside reverse transcriptase inhibitors: a cross-sectional study**

|                                 |                                                                                                                                                                                                                                                                                                                                                                                                                                                                                                                                                                                                                                                                                                    |
|---------------------------------|----------------------------------------------------------------------------------------------------------------------------------------------------------------------------------------------------------------------------------------------------------------------------------------------------------------------------------------------------------------------------------------------------------------------------------------------------------------------------------------------------------------------------------------------------------------------------------------------------------------------------------------------------------------------------------------------------|
| Journal:                        | <i>BMJ Open</i>                                                                                                                                                                                                                                                                                                                                                                                                                                                                                                                                                                                                                                                                                    |
| Manuscript ID:                  | bmjopen-2012-001317.R1                                                                                                                                                                                                                                                                                                                                                                                                                                                                                                                                                                                                                                                                             |
| Article Type:                   | Research                                                                                                                                                                                                                                                                                                                                                                                                                                                                                                                                                                                                                                                                                           |
| Date Submitted by the Author:   | 08-Jul-2012                                                                                                                                                                                                                                                                                                                                                                                                                                                                                                                                                                                                                                                                                        |
| Complete List of Authors:       | Pefura Yone, Eric Walter; Faculty of Medicine and Biomedical Sciences, University of Yaounde 1, Department of Internal Medicine and Subspecialties; Yaounde Jamot Hospital, Service of Pneumology Kengne, Andre; South African Medical Research Council, Ashuntantang, Gloria; Faculty of Medicine and Biomedical Sciences, University of Yaounde 1, Department of Internal Medicine and Subspecialties; Yaounde General Hospital, Medicine Service Betyoumin, Awa; Yaounde University centre, Department of Biochemistry Ngogang, Jeanne; Faculty of Medicine and Biomedical Sciences, University of Yaounde 1, Department of Biochemistry; Yaounde University centre, Department of Biochemistry |
| <b>Primary Subject Heading</b>: | Infectious diseases                                                                                                                                                                                                                                                                                                                                                                                                                                                                                                                                                                                                                                                                                |
| Secondary Subject Heading:      | Pharmacology and therapeutics, Nutrition and metabolism, Sexual health                                                                                                                                                                                                                                                                                                                                                                                                                                                                                                                                                                                                                             |
| Keywords:                       | HIV & AIDS < INFECTIOUS DISEASES, Adverse events < THERAPEUTICS, Lipid disorders < DIABETES & ENDOCRINOLOGY                                                                                                                                                                                                                                                                                                                                                                                                                                                                                                                                                                                        |
|                                 |                                                                                                                                                                                                                                                                                                                                                                                                                                                                                                                                                                                                                                                                                                    |

SCHOLARONE™  
Manuscripts

1  
2  
3 **Dyslipidemia in HIV-1 infected patients receiving protease inhibitors after initial**  
4 **treatment with first-line based non-nucleoside reverse transcriptase inhibitors: a cross-**  
5 **sectional study**  
6  
7  
8

9  
10 Short title: **Protease inhibitors and dyslipidaemia**

11 Eric Walter PEFURA YONE (1, 2), André Pascal KENGNE (3), Gloria ASHUNTANTANG  
12 (1,4), Awa FOUEUDJEU BETYOUUMIN (5), Jeanne NGOGANG (5,6)  
13

14  
15  
16  
17 1) Department of Internal Medicine and Subspecialties, Faculty of Medicine and Biomedical  
18 Sciences, University of Yaounde 1, Cameroon

19 2) Service of Pneumology, Yaounde Jamot Hospital

20 3) South African Medical Research Council & University of Cape Town, South Africa

21 4) Service of Internal Medicine, Yaounde General Hospital

22 5) Department of Biochemistry, Yaounde University centre

23 6) Department of Biochemistry, Faculty of Medicine and Biomedical Sciences, University of  
24 Yaounde 1, Cameroon  
25  
26  
27  
28  
29  
30  
31

32 **Correspondence to:**

33  
34  
35 Dr Eric Walter Pefura Yone,

36  
37 Yaounde Jamot Hospital,

38  
39 PO Box 4021-Yaounde, Cameroon

40  
41  
42 Tel: (237)96539726, Fax: (237)22203165,

43  
44 Email: pefura2002@yahoo.fr  
45  
46

47 **Tables: 2**

48 **Figures: 0**

49 **Online only material: 0**

50  
51  
52 **Word count:** abstract-287; Main text (excluding tables, figures, abstract & references)-1,954  
53

54  
55 **References: 27**  
56  
57  
58  
59  
60

## Abstract

**Objectives:** Lipid abnormalities associated with antiretroviral therapy in people with HIV infection are more frequent with protease inhibitors (PI) based regimens. Whether effects extend to patients receiving a PI subsequent to failure on non-nucleoside reverse-transcriptase inhibitors (NNRTI) based regimen, is still unknown. We investigated the effects of secondary treatment with a PI on the lipid profile in a group of patients with HIV infection in Cameroon.

**Design:** This was a cross-sectional study.

**Setting:** This study was carried out at the registered centre for HIV treatment of the Yaounde Jamot hospital in Cameroon.

**Participants:** Participants were consecutively recruited between November 2009 and January 2010. There were 138 HIV-1 patients on initial treatment with a NNRTI regimen and 66 HIV-1 patients on secondary treatment with a PI for at least 12 months. Lipid abnormalities were based on the National Cholesterol Education Program, Adult Treatment Panel III criteria.

**Outcome measures:** Levels of lipid parameters among patients on PI and NNRTI.

**Results:** Median (interquartile range) levels (mg/dl), NNRTI-treated vs. PI-treated patients were 185 (149-225) and 189 (147-244) for total cholesterol, 46 (27-66) and 42 (28-82) for HDL-cholesterol, 121 (90-169) and 126.9 (71-176) for LDL-cholesterol, 134 (98-174) and 138 (111-167) for triglycerides, and 4.3 (2.9-6.2) and 5.1 (2.6-7.9) for total/HDL-cholesterol ratio (all  $p>0.32$ ). The most frequent lipid abnormality in the two groups was high LDL-cholesterol [46.4% (NNRTI) vs. 54.5% (PI)]. Occurrence of lipid abnormalities was similar in the two groups (all  $p>0.29$ ).

**Conclusions:** The use of PI does not appear to deteriorate the lipid profile of HIV patients above and beyond abnormalities induced by an unsuccessful initial treatment with NNRTI. Monitoring of lipid profile during HIV treatment regardless of the regimens would improve timely detection and management of abnormalities, to mitigate related risks.

1  
2  
3 *Word count – 287*

4  
5 *Key words – HIV infection, antiretroviral therapy, protease inhibitors, non-nucleoside reverse-*  
6  
7 *transcriptase inhibitors, lipid profile*

8  
9  
10 **Article summary**

11  
12 **Article focus:**

- 13  
14  
15 - To investigate the effects of secondary treatment with a protease inhibitors on the lipid  
16  
17 profile in a group of patients with HIV infection in Cameroon.

18  
19 **Key messages:**

- 20  
21 - The differential contribution of antiretroviral agents to lipid abnormalities suggests that  
22  
23 hypothetically, switching patients from first-line to second-line treatment may have  
24  
25 deleterious effects on their lipid profile.  
26  
27  
28 - Effects of protease inhibitors on lipid profile among patients receiving the protease  
29  
30 inhibitors subsequent to failure on non-nucleoside reverse-transcriptase inhibitors based  
31  
32 regimen are still unknown.  
33  
34  
35 - In this study, the use of protease inhibitors does not appear to deteriorate the lipid profile of  
36  
37 HIV patients above and beyond abnormalities induced by an unsuccessful initial treatment  
38  
39 with non-nucleoside reverse-transcriptase inhibitors.  
40

41  
42 **Strengths and limitations:**

- 43  
44 - To our knowledge, such hypothesis has not yet been tested.  
45  
46 - This is a cross-sectional study which lacked the previous level of lipid parameters of  
47  
48 participants.  
49

## INTRODUCTION

Antiretroviral treatments are associated with widely described abnormal changes in the lipid profile in people with HIV infection.[1-4] Although more frequent during treatment with protease inhibitors (PI),[1,5,6] these changes are also observed during treatment with stavudine and to a lesser extent with non-nucleoside reverse-transcriptase inhibitors (NNRTI).[1,7] Such changes include raised total and LDL cholesterol, raised triglycerides and variable effects on HDL cholesterol levels.[1,6]

The increasing rollout of antiretroviral treatment over the last ten years has significantly improved survival among people living with HIV.[8] This however has been achieved at the cost of increasing resistance to first-line antiretroviral therapies.[9,10] In sub-Saharan Africa (SSA), the epicentre of HIV pandemic, the widely used first-line antiretroviral regimen, inspired by the World Health Organisation (WHO), combines two nucleoside reverse-transcriptase inhibitors (NRTI) with a non-nucleoside reverse-transcriptase inhibitor (NNRTI).[9] Protease inhibitors (PI) are the compulsory component of the second line treatment subsequent to the failure of the first-line one in this setting.[11,12] The differential contribution of antiretroviral agents to lipid abnormalities suggests that hypothetically, switching patients from first-line to second-line treatment in SSA may have deleterious effects on their lipid profile. However, such hypothesis has not yet been tested.

We compared the lipid profile of HIV-1 patients receiving the WHO recommended 1<sup>st</sup>-line therapy with that of patients on 2<sup>nd</sup>-line therapy subsequent to first-line treatment failure.

## PARTICIPANTS AND METHODS

### Study setting and Participants

This cross-sectional study was conducted at the registered centre for HIV treatment of the Yaounde Jamot hospital in Cameroon. The study setting has been described in details elsewhere.[13] Participants were consecutively recruited between November 2009 and

1  
2  
3 January 2010. Two groups of HIV-1 positive participants were selected. The first group  
4  
5 included individuals who had received antiretroviral treatment for the 12 preceding months or  
6  
7 more, based on the WHO first-line regimens or NNRTI-based regimen (NNRTI-based group).  
8  
9 The second group included individuals who were receiving second-line antiretroviral  
10  
11 treatment or PI based regimen for at least 12 months after failure of the first-line regimen (PI-  
12  
13 based group). First-line ART regimens applied to these participants combined lamivudine  
14  
15 (3TC) and stavudine (d4T) or zidovudine (AZT) with nevirapine (NVP) or efavirenz (EFV).  
16  
17 The PI-based regimens included abacavir (ABC), didanosine (DDI) and lopinavir/ritonavir  
18  
19 (LPV-r) or indinavir (IDV). The choice of regimens is unrelated to potential factors that could  
20  
21 induce a dyslipidemia, since lipid profile assessment is a requirement in routine pre-ART  
22  
23 treatment evaluation in this setting.[14] Failure on 1<sup>st</sup> line antiretroviral therapy in the study  
24  
25 setting is based on persisting plasmatic HIV-1 viral load of 5000 copies/ml or greater, after a  
26  
27 year on antiretroviral treatment. Diagnosis of therapeutic failure to the first-line ART is  
28  
29 always confirmed after a reinforcement of the adherence for a period of 3 months.[11]  
30  
31 Patients who had had their treatment regimens changed during follow-up were excluded.  
32  
33 Participants had to be at least 18 years of age and to have a treatment adherence rate  $\geq 95\%$ .  
34  
35 Level of adherence was assessed by verbal administration of a standard series of questions  
36  
37 adapted from Adult AIDS clinical trials group (AACTG) adherence instruments. The 95%  
38  
39 rate of adherence is preferable to 4-day recall data.[15] Participants were also required not to  
40  
41 be on lipid modifying therapies at their enrolment. All participants gave their inform consent  
42  
43 and the study was approved by the Cameroon National Ethic Committee (ref  
44  
45 N°150/CNE/SE/09).

## 51 **Procedures**

52  
53 For each participant, data were collected on the sociodemographic background, past medical  
54  
55 history including the use of medications that could modify the lipid profile and active or  
56  
57

1  
2  
3 history of tuberculosis. Lymphocytes count for all participants used flux cytometry methods  
4 implemented with BD FASCOUNT automate (BD Biosciences, Le pont de Claix, France).  
5  
6 Lipid profile was assessed through enzymatic methods (Linear chemicals, Montgat, Spain)  
7 and included total cholesterol (TC), HDL-cholesterol (HDL-c), LDL-cholesterol (LDL-c) and  
8 triglycerides (TG). To this end, blood sample was collected after an overnight fast (12 hours)  
9 and centrifuged at 3000 cycles/minute, and the serum obtained was then used for lipids  
10 determination. The TC/HDL-c ratio was also calculated. Abnormal lipid profile was defined  
11 in accordance with the US National Cholesterol Education Program, Adult Treatment Panel  
12 III (NCEP-ATP III) guidelines, as TC  $\geq$  200mg/dl, HDL-c < 40mg/dl, LDL-c  $\geq$  130mg/dl, TG  
13  $\geq$  150mg/dl and TC/HDL-c ratio  $\geq$  5.[16]

### 24 25 **Statistical analysis**

26  
27 Sample size was determined assuming a 35% prevalence of total cholesterol  $\geq$  200 mg/dl in  
28 the NNTI based group, a minimum detectable unadjusted odds ratio (OR) of 2, a Type I error  
29 of 5% and a power of 80%.[17] Based on the above, the required sample size was 84  
30 participants (42 NNTI treated patients and 42 PI treated patients). Data analysis used the  
31 Statistical package for social sciences (SPSS) version 17 for Windows (SPSS, Chicago, IL).  
32 Differences in means and proportions for participants' characteristics were assessed using  
33 Student t-test, Mann –Whitney U test and  $\chi^2$  tests. A probability threshold of  $p < 0.05$  was  
34 used to characterise statistical significant results.

## 35 36 **RESULTS**

### 37 38 **Study population**

39  
40 The total number of participants included in each study group was 138 (NNRTI-based  
41 regimen) and 66 (PI-based regimen). NNRTI-based regimens were d4T/3TC/NVP (61  
42 patients), d4T/3TC/EFV (32 patients), AZT/3TC/NVP (31 patients) and AZT/3TC/EFV (14  
43 patients); while PI-based regimens were DDI/ABC/INV (35 patients) and DDI/ABC/LPV-r  
44

(31 patients). The characteristic of participants are summarised in Table 1. The median duration on ART was higher among participants in the PI-regimen group than among those on NNRTI-regimens (36 vs. 28 months,  $p=0.001$ ). This included a 22-month period on NNRTI-regimens and 14-month duration on PI-based regimens. Sex distribution, mean age, body mass index and median CD4 count were similar between the two study groups (Table 1).

Table 1: Profile of 138 patients on NNRTI-based regimens and 66 patients on protease inhibitors based regimens

| Characteristics                                  | NNRTI-based regimen<br>(n=138) | PI-based regimen<br>(n=66) | p     |
|--------------------------------------------------|--------------------------------|----------------------------|-------|
| Women, n (%)                                     | 90 (65.2)                      | 39 (59.1)                  | 0.396 |
| Mean age, years (SD)                             | 40.6 (8.7)                     | 42.5 (8.7)                 | 0.154 |
| Mean body mass index, kg/m <sup>2</sup> (SD)     | 24.6 (4.7)                     | 23.8 (3.9)                 | 0.208 |
| Median CD4 count, per mm <sup>3</sup> (IQR)      | 333(206-459)                   | 330 (172-451)              | 0.747 |
| Median duration on ART, months (IQR)             | 28 (13-40)                     | 36 (24-50)                 | 0.001 |
| Median duration on NNRTI-based ART, months (IQR) | 28 (13-40)                     | 22 (10-36)                 | 0.001 |
| Median duration on PI-based ART, months (IQR)    | NA                             | 14 (12-20)                 | NA    |

NNRTI, non-nucleoside reverse transcriptase inhibitors; PI, protease inhibitor; ART, antiretroviral therapy; SD, standard deviation; IQR, interquartile range; NA, not applicable

### Lipid profile

Median levels of TC, HDL-c, LDL-c, triglycerides and lipid ratio were similar between participants on PI-based regimens and those on NNRTI-based regimens (Table 2). The prevalence of lipid abnormalities (NNRTI-based vs. PI-based regimens) was 38% vs. 44% for  $TC \geq 200$  mg/dl ( $p=0.39$ ), 46% vs. 56% for  $LDL-c \geq 130$  mg/dl ( $p=0.30$ ), 40% vs. 46% for  $HDL-c < 40$  mg/dl ( $p=0.54$ ), 44 vs. 36% for  $triglycerides \geq 150$  mg/dl ( $p=0.33$ ) and 36% vs. 29% for  $TC/HDL-c \geq 5$  ( $p=0.34$ ). The pattern was similar in men and women, participants



above and below median age, and after adjustment for age, sex, and total duration on ART in linear and logistic regression analyses.

Among patients on NNRTI, median (interquartile range) levels (mg/dl) of lipid variables, d4T-treated vs. AZT-treated patients were 180.3 (149.2-227.1) and 227.3 (187.7-270.7),  $p=0.632$  for total cholesterol, 133.1 (96.4-167.7) and 136.0 (136.0-101.5-189.3),  $p=0.389$  for triglycerides, 46.6 (27-67.2) and 45.2 (26.3-59.8),  $p=0.624$  for HDL-cholesterol, 116.8 (87.7-163.7) and 134.9 (90.6-172.7),  $p=0.280$  for LDL-cholesterol and, 4.1 (2.5-5.9) and 4.6(3.3-6.9),  $p=0.341$  for total cholesterol/HDL-cholesterol ratio.

Among patients on protease inhibitors, median (interquartile range) levels (mg/dl) levels of lipid variables, IDV-treated vs. LPV/r-treated patients were 171.9 (146.8-253.0) vs 193.8 (146.0-239.8),  $p=0.959$  for total cholesterol, [135.2(108.2-167.4) and 138.6 (112.4-162.2),  $p=0.96$  for triglycerides, 45.1 (32.1-60.1) and 39.6 (24.0-53.8),  $p=0.23$  for HDL-cholesterol, 114.7 (54.4-176.7) and 130.5 (85.6-171.5) ,  $p=0.64$  for LDL-cholesterol and, 4.8 (2.4-7.6) and 5.5 (2.9-8.0),  $p=0.576$  for total cholesterol/HDL-cholesterol ratio.

Table 2: Median levels of different lipid parameters in patients on NNRTI-based and PI-based regimens in Yaounde, Cameroon

| Lipid variable              | NNRTI-based regimen<br>(n=138) | PI-based regimen<br>(n=66) | p     |
|-----------------------------|--------------------------------|----------------------------|-------|
| Total cholesterol, mg/dl    | 184.7 (149.3-225.0)            | 189.5 (146.7-243.8)        | 0.688 |
| HDL cholesterol, mg/dl      | 45.84(27.0-66.0)               | 42.16(27.6-82.3)           | 0.568 |
| LDL cholesterol, mg/dl      | 121.4(89.7-168.7)              | 126.9(70.8-176.5)          | 0.767 |
| Triglycerides, mg/dl        | 134.5 (98.3-174.0)             | 138.0 (111.1-166.6)        | 0.468 |
| Total/HDL-cholesterol ratio | 4.3 (2.9-6.2)                  | 5.1 (2.6-7.9)              | 0.329 |

Data are median (interquartile range); NNRTI, non-nucleoside reverse transcriptase inhibitors; PI, protease inhibitor

## DISCUSSION

There is an abundant literature on the improvement of lipid profile of people with HIV subsequent substitution of NNRTI or NRTI for PI in the treatment regimens.[18] We are not aware of a study that has examined the effects of PI on lipid profile of patients initially treated with NNRTI. The current study was conducted in a setting where virtually all treated HIV-1 patients are almost always started on a NNRTI-based regimen as first-line therapy, and shifted to PI-based regimens only after failure of the first-line therapy. Our findings suggest that this transition to PI-based regimens may not be associated with significant deterioration of the lipid profile.[1,7] Indeed, median serum lipid levels and prevalence of lipid abnormalities were similar in patients on initial treatment with a NNRTI-regimen and those on secondary treatment with a PI-regimen. These findings were consistent by gender, age and CD4 count, and robust to adjustment for several covariates.

In sub-Saharan and other developing countries, NNRTI-based regimens not containing a PI are associated with pro-atherogenic adverse lipid changes.[17,19-21] However, the World Health Organisation's recommendations,[11,12] enforced at the country level in Cameroon[14] and elsewhere, suggest that only those HIV patients on a PI should be screened for dyslipidemia. These recommendations are applied against a background of scarcity of comparative studies on lipid profile of patients and NNRTI with that of those on a PI. By demonstrating findings suggesting that continuation treatment with a PI may not necessarily induce lipid derangements above and beyond those induced by prior NNRTI, our study emphasizes the need to extend screening for dyslipidemia in this setting to any patient on antiretroviral therapy regardless of the regimens. Such an approach may help early detection of lipid abnormalities and mitigation of related risks.

High LDL-cholesterol was the most common lipid abnormality found in our study. High LDL-cholesterol is a major lipid abnormality, and a treatment target for cardiovascular

1  
2  
3 prevention.[22] That lipid abnormalities in the general population in Cameroon and other  
4  
5 countries in the region are generally rare, suggests that lipid abnormalities in our patients were  
6  
7 induced by antiretroviral therapy. It is also possible that high LDL-cholesterol was at least in  
8  
9 part the result of the 'catch-up phenomenon'. Indeed, untreated HIV infection is associated  
10  
11 with low LDL-c,[23-25] and levels generally increase subsequent to starting antiretroviral  
12  
13 therapy. The derangements of the lipid profile were similar in our patients treated with the  
14  
15 regimen containing IDV or LPV-r. Likewise, the levels of lipid fractions were similar  
16  
17 between patients receiving d4T-based regimens and those receiving AZT-based regimens.  
18  
19 Thus, d4T does not seem to induce more dyslipidaemia in our patients as described in other  
20  
21 studies [1,5]. In this study, HDL-c level was similar between patients treated with NNRTI and  
22  
23 those secondary treated with PI. Thus, switching of NNRTI regimens to PI regimens was not  
24  
25 associated with increased of the HDL-c level. However, the results of the SMART study have  
26  
27 shown that the use of PI is associated with a decrease of HDL-c level compared to the use of  
28  
29 NNRTI, resulting in a higher atherogenic risk in patients treated with PI.[26]  
30  
31  
32  
33

34  
35 Total cholesterol/HDL cholesterol ratio, a commonly used indicator of the atherogenic  
36  
37 potential of the lipid profile [27] was similar between patient on a PI and those on NNRTI-  
38  
39 regimens. This suggests that, at least in medium term, treatment with a PI does not deteriorate  
40  
41 the atherogenic potential of the lipid profile of patients previously on NNRTI-based regimens.  
42  
43 Our study has some limitations. The cross-sectional design precludes any inference about  
44  
45 causality. It is unlikely that patients who failed on first-line antiretroviral therapy in this  
46  
47 setting are those with favourable lipid profile, and that our findings may actually reflect  
48  
49 subsequent deterioration, causing their profile to be similar to that of a broader population on  
50  
51 NNRTI. Indeed, our previous investigations in this setting suggest that markers of disease  
52  
53 severity such as CD4 counts are not associated with lipid abnormalities.[19] It is also possible  
54  
55  
56  
57  
58  
59  
60

1  
2  
3 that with a much large sample, some of the small differences could become significant. This  
4  
5 however, would not invalidate the conclusions from the study. Previous studies have  
6  
7 demonstrated lipid abnormalities to be more frequent in NNRTI than in ART-naïve patients in  
8  
9 this setting,[19] precluding the need for an ART-naïve control group in the present study. Our  
10  
11 study also has major advantages, for instance, by demonstrating perhaps for the first time that  
12  
13 transition from a NNRTI-based regimen to a PI-based regimen should not necessarily invite  
14  
15 changes in the monitoring protocol for lipid abnormalities.  
16

17  
18 In conclusion, treatment of HIV-1 patients with protease-inhibitors based regimens  
19  
20 subsequent to failure on NNRTI-based regimens may not deteriorate the lipid profile above  
21  
22 and beyond derangements cause by prior NNRTI in our setting. Recommendations for lipid  
23  
24 abnormalities in HIV patients on treatment should apply to everyone on antiretroviral  
25  
26 treatment in this setting. Cohort data are needed to refine the findings from this study and  
27  
28 monitor the adverse consequence of lipid derangements.  
29  
30

31  
32 **Competing interests** – None for all authors

33  
34 **Source of funding** – None

35  
36 **Authors' contribution** – EWPY conceived the study, supervised data collection, co-analysed  
37  
38 the data and drafted of the manuscript; APK contributed to study designed, data analysis,  
39  
40 drafting and critical revision of the manuscript; GA contributed to study design and critically  
41  
42 revised the manuscript; AFB contributed to data collection, co-analysed the data and drafting  
43  
44 of the manuscript; JN supervised data collection and critically revised the manuscript. All  
45  
46 authors approved the final version of the manuscript.  
47

## 48 49 REFERENCES

- 50  
51 1. Grunfeld C. Dyslipidemia and its treatment in HIV infection. *Top HIV Med*  
52  
53 2010;**18**:112-8.  
54  
55

- 1  
2  
3 2. Troll JG. Approach to dyslipidemia, lipodystrophy, and cardiovascular risk in patients  
4 with HIV infection. *Curr Atheroscler Rep* 2011;**13**:51-56.
- 5  
6  
7 3. Haubrich RH, Riddler SA, DiRienzo AG et al. Metabolic outcomes in a randomized  
8 trial of nucleoside, nonnucleoside and protease inhibitor-sparing regimens for initial  
9 HIV treatment. *AIDS* 2009, **23**:1109-1118.
- 10  
11  
12 4. Friis-Moller N, Sabin CA, Weber R et al. Combination antiretroviral therapy and the  
13 risk of myocardial infarction. *N Engl J Med* 2003, **349**:1993-2003.
- 14  
15  
16 5. Heath KV, Chan KJ, Singer J, et al. Incidence of morphological and lipid  
17 abnormalities: Gender and treatment differentials after initiation of first antiretroviral  
18 therapy. *Int J Epidemiol* 2002;**31**:1016-1020.
- 19  
20  
21 6. Feeney ER, Mallon PW. HIV and HAART-associated dyslipidemia. *Open Cardiovasc*  
22 *Med J* 2011;**5**:49-63.
- 23  
24  
25 7. Domingos H, Cunha RV, Paniago AM, et al. Metabolic effects associated to the highly  
26 active antiretroviral therapy (HAART) in AIDS patients. *Braz J Infect Dis*  
27 2009;**13**:130-6.
- 28  
29  
30 8. Palella FJ, Jr., Delaney KM, Moorman AC, et al. Declining morbidity and mortality  
31 among patients with advanced human immunodeficiency virus infection. HIV  
32 outpatient study investigators. *N Engl J Med* 1998;**338**:853-60.
- 33  
34  
35 9. Gsponer T, Petersen M, Egger M, et al. The causal effect of switching to second-line  
36 ART in programmes without access to routine viral load monitoring. *AIDS*  
37 2012;**26**:57-65.
- 38  
39  
40 10. von Wyl V, Yerly S, Boni J, et al. Incidence of hiv-1 drug resistance among  
41 antiretroviral treatment-naive individuals starting modern therapy combinations. *Clin*  
42 *Infect Dis* 2012;**54**:131-140.
- 43  
44  
45  
46  
47  
48  
49  
50  
51  
52  
53  
54  
55  
56  
57  
58  
59  
60

- 1  
2  
3 11. Organisation Mondiale de la Santé. Recommandations rapides: Traitement  
4 antirétroviral de l'infection à VIH chez l'adulte et l'adolescent 2010.  
5  
6  
7 [http://www.who.int/hiv/pub/arv/rapid\\_advice\\_art\\_fr.pdf](http://www.who.int/hiv/pub/arv/rapid_advice_art_fr.pdf) (Accessed 12 December,  
8  
9 2011).
- 10  
11  
12 12. Ministère de la Santé Publique du Cameroun. Directives nationales de prise en charge  
13 par les antirétroviraux des personnes (adultes et adolescents) infectés par le VIH.  
14 Yaoundé 2010.
- 15  
16  
17  
18 13. Pefura Yone EW, Kengne AP, Kuaban C. Incidence, time and determinants of  
19 tuberculosis treatment default in yaounde, cameroon: A retrospective hospital register-  
20 based cohort study. *BMJ Open* 2011;**1**:e000289.
- 21  
22  
23  
24  
25 14. World Health Organization. Antiretroviral therapy for HIV infection in adults and  
26 adolescents in resource-limited settings: Towards universal access. 2006 revision  
27  
28 <http://www.who.int/hiv/pub/arv/adult/fr/index.html> (Accessed 10 October 2010).
- 29  
30  
31  
32 15. Chesney MA, Ickovics JR, Chambers DB, et al. Self-reported adherence to  
33 antiretroviral medications among participants in HIV clinical trials: The AACTG  
34 adherence instruments. Patient care committee & adherence working group of the  
35 outcomes committee of the adult aids clinical trials group (aactg). *AIDS Care*  
36 2000;**12**:255-66.
- 37  
38  
39  
40  
41  
42  
43 16. Third Report of the National Cholesterol Education Program (NCEP) Expert Panel on  
44 Detection, Evaluation, and Treatment of High Blood Cholesterol in Adults (Adult  
45 Treatment Panel III) final report. *Circulation* 2002; **106**:3143-421.
- 46  
47  
48  
49  
50  
51  
52  
53  
54  
55  
56  
57  
58  
59  
60

- 1  
2  
3 17. Zannou DM, Denoeud L, Lacombe K, et al. Incidence of lipodystrophy and metabolic  
4 disorders in patients starting non-nucleoside reverse transcriptase inhibitors in benin.  
5 *Antivir Ther* 2009;**14**:371-80.  
6  
7  
8  
9  
10 18. Lake JE, Currier JS. Switching antiretroviral therapy to minimize metabolic  
11 complications. *HIV Ther* 2010;**4**:693-711.  
12  
13  
14 19. Pefura Yone EW, Betyoumin AF, Kengne AP, et al. First-line antiretroviral therapy  
15 and dyslipidemia in people living with hiv-1 in cameroon: A cross-sectional study.  
16 *AIDS Res Ther* 2011;**8**:33.  
17  
18  
19  
20 20. Buchacz K, Weidle PJ, Moore D, et al. Changes in lipid profile over 24 months among  
21 adults on first-line highly active antiretroviral therapy in the home-based aids care  
22 program in rural uganda. *J Acquir Immune Defic Syndr* 2008;**47**:304-11.  
23  
24  
25  
26  
27 21. Padmapriyadarsini C, Ramesh Kumar S, Terrin N, et al. Dyslipidemia among hiv-  
28 infected patients with tuberculosis taking once-daily nonnucleoside reverse-  
29 transcriptase inhibitor-based antiretroviral therapy in india. *Clin Infect Dis*  
30  
31  
32  
33 2011;**52**:540-46.  
34  
35  
36 22. Grundy SM, Cleeman JI, Merz CN, et al. Implications of recent clinical trials for the  
37 national cholesterol education program adult treatment panel iii guidelines. *J Am Coll*  
38  
39  
40  
41  
42  
43 23. Oka F, Naito T, Oike M, et al. Correlation between HIV disease and lipid metabolism  
44 in antiretroviral-naive HIV-infected patients in japan. *J Infect Chemother* 2011; DOI  
45  
46  
47  
48 10.1007/s10156-011-0275-5.  
49  
50 24. Constans J, Pellegrin JL, Peuchant E, et al. Plasma lipids in HIV-infected patients: A  
51  
52  
53  
54  
55 25. Riddler SA, Smit E, Cole SR, et al. Impact of HIV infection and HAART on serum  
56  
57  
58  
59  
60

- 1  
2  
3 26. Phillips AN, Carr A, Neuhaus J, et al. Interruption of antiretroviral therapy and risk of  
4 cardiovascular disease in persons with HIV-1 infection: Exploratory analyses from the  
5 SMART trial. *Antivir Ther.* 2008;**13**:177-187.  
6  
7  
8  
9 27. Hsia SH, Pan D, Berookim P, et al. A population-based, cross-sectional comparison of  
10 lipid-related indexes for symptoms of atherosclerotic disease. *Am J Cardiol*  
11  
12 2006;**98**:1047-1052.  
13  
14  
15  
16  
17  
18  
19  
20  
21  
22  
23  
24  
25  
26  
27  
28  
29  
30  
31  
32  
33  
34  
35  
36  
37  
38  
39  
40  
41  
42  
43  
44  
45  
46  
47  
48  
49  
50  
51  
52  
53  
54  
55  
56  
57  
58  
59  
60



## STROBE Statement—checklist of items that should be included in reports of observational studies

|                           | Item No | Recommendation                                                                                                                                                                             | Pages |
|---------------------------|---------|--------------------------------------------------------------------------------------------------------------------------------------------------------------------------------------------|-------|
| <b>Title and abstract</b> | 1       | (a) Indicate the study's design with a commonly used term in the title or the abstract                                                                                                     | 1     |
|                           |         | (b) Provide in the abstract an informative and balanced summary of what was done and what was found                                                                                        | 2     |
| <b>Introduction</b>       |         |                                                                                                                                                                                            |       |
| Background/rationale      | 2       | Explain the scientific background and rationale for the investigation being reported                                                                                                       | 4     |
| Objectives                | 3       | State specific objectives, including any prespecified hypotheses                                                                                                                           | 4     |
| <b>Methods</b>            |         |                                                                                                                                                                                            |       |
| Study design              | 4       | Present key elements of study design early in the paper                                                                                                                                    | 4,5   |
| Setting                   | 5       | Describe the setting, locations, and relevant dates, including periods of recruitment, exposure, follow-up, and data collection                                                            | 4,5   |
| Participants              | 6       | (a) <i>Cohort study</i> —Give the eligibility criteria, and the sources and methods of selection of participants. Describe methods of follow-up                                            | /     |
|                           |         | <i>Case-control study</i> —Give the eligibility criteria, and the sources and methods of case ascertainment and control selection. Give the rationale for the choice of cases and controls | /     |
|                           |         | <i>Cross-sectional study</i> —Give the eligibility criteria, and the sources and methods of selection of participants                                                                      | 4,5   |
|                           |         | (b) <i>Cohort study</i> —For matched studies, give matching criteria and number of exposed and unexposed                                                                                   | /     |
| Variables                 | 7       | <i>Case-control study</i> —For matched studies, give matching criteria and the number of controls per case                                                                                 | /     |
|                           |         | Clearly define all outcomes, exposures, predictors, potential confounders, and effect modifiers. Give diagnostic criteria, if applicable                                                   | 5,6   |
| Data sources/measurement  | 8*      | For each variable of interest, give sources of data and details of methods of assessment (measurement). Describe comparability of assessment methods if there is more than one group       | 5,6   |
| Bias                      | 9       | Describe any efforts to address potential sources of bias                                                                                                                                  | 5     |
| Study size                | 10      | Explain how the study size was arrived at                                                                                                                                                  | 6     |
| Quantitative variables    | 11      | Explain how quantitative variables were handled in the analyses. If applicable, describe which groupings were chosen and why                                                               | 6     |
| Statistical methods       | 12      | (a) Describe all statistical methods, including those used to control for confounding                                                                                                      | 6     |
|                           |         | (b) Describe any methods used to examine subgroups and interactions                                                                                                                        | /     |
|                           |         | (c) Explain how missing data were addressed                                                                                                                                                | /     |
|                           |         | (d) <i>Cohort study</i> —If applicable, explain how loss to follow-up was addressed                                                                                                        |       |
|                           |         | <i>Case-control study</i> —If applicable, explain how matching of cases and controls was addressed                                                                                         |       |
|                           |         | <i>Cross-sectional study</i> —If applicable, describe analytical methods taking account of sampling strategy                                                                               | 6     |
|                           |         | (e) Describe any sensitivity analyses                                                                                                                                                      |       |

Continued on next page

**Results**

|                  |     |                                                                                                                                                                                                              |                |
|------------------|-----|--------------------------------------------------------------------------------------------------------------------------------------------------------------------------------------------------------------|----------------|
| Participants     | 13* | (a) Report numbers of individuals at each stage of study—eg numbers potentially eligible, examined for eligibility, confirmed eligible, included in the study, completing follow-up, and analysed            | 6              |
|                  |     | (b) Give reasons for non-participation at each stage                                                                                                                                                         | /              |
|                  |     | (c) Consider use of a flow diagram                                                                                                                                                                           | /              |
| Descriptive data | 14* | (a) Give characteristics of study participants (eg demographic, clinical, social) and information on exposures and potential confounders                                                                     | 6,7            |
|                  |     | (b) Indicate number of participants with missing data for each variable of interest                                                                                                                          | Not applicable |
|                  |     | (c) <i>Cohort study</i> —Summarise follow-up time (eg, average and total amount)                                                                                                                             |                |
| Outcome data     | 15* | <i>Cohort study</i> —Report numbers of outcome events or summary measures over time                                                                                                                          |                |
|                  |     | <i>Case-control study</i> —Report numbers in each exposure category, or summary measures of exposure                                                                                                         |                |
|                  |     | <i>Cross-sectional study</i> —Report numbers of outcome events or summary measures                                                                                                                           | 7              |
| Main results     | 16  | (a) Give unadjusted estimates and, if applicable, confounder-adjusted estimates and their precision (eg, 95% confidence interval). Make clear which confounders were adjusted for and why they were included | Not applicable |
|                  |     | (b) Report category boundaries when continuous variables were categorized                                                                                                                                    | /              |
|                  |     | (c) If relevant, consider translating estimates of relative risk into absolute risk for a meaningful time period                                                                                             | /              |
| Other analyses   | 17  | Report other analyses done—eg analyses of subgroups and interactions, and sensitivity analyses                                                                                                               | 8              |

**Discussion**

|                  |    |                                                                                                                                                                            |           |
|------------------|----|----------------------------------------------------------------------------------------------------------------------------------------------------------------------------|-----------|
| Key results      | 18 | Summarise key results with reference to study objectives                                                                                                                   | 9         |
| Limitations      | 19 | Discuss limitations of the study, taking into account sources of potential bias or imprecision. Discuss both direction and magnitude of any potential bias                 | 9,10      |
| Interpretation   | 20 | Give a cautious overall interpretation of results considering objectives, limitations, multiplicity of analyses, results from similar studies, and other relevant evidence | 8,9,10,11 |
| Generalisability | 21 | Discuss the generalisability (external validity) of the study results                                                                                                      | 11        |

**Other information**

|         |    |                                                                                                                                                               |    |
|---------|----|---------------------------------------------------------------------------------------------------------------------------------------------------------------|----|
| Funding | 22 | Give the source of funding and the role of the funders for the present study and, if applicable, for the original study on which the present article is based | 11 |
|---------|----|---------------------------------------------------------------------------------------------------------------------------------------------------------------|----|

\*Give information separately for cases and controls in case-control studies and, if applicable, for exposed and unexposed groups in cohort and cross-sectional studies.

**Note:** An Explanation and Elaboration article discusses each checklist item and gives methodological background and published examples of transparent reporting. The STROBE checklist is best used in conjunction with this article (freely available on the Web sites of PLoS Medicine at <http://www.plosmedicine.org/>, Annals of Internal Medicine at <http://www.annals.org/>, and Epidemiology at <http://www.epidem.com/>). Information on the STROBE Initiative is available at [www.strobe-statement.org](http://www.strobe-statement.org).
